# Supplementary material for: MicroRNA-focused CRISPR-Cas9 library screen reveals fitness-associated miRNAs
Source: PubMed Central journal article supplement — RNA. 2018 Jul;24(7):966–81. doi: 10.1261/rna.066282.118 (PMC6004052; doi:10.1261/rna.066282.118), 2018-07
Supplement: supp_066282.118_Supplemental_Fig_S1.pdf [file supp_066282.118_Supplemental_Fig_S1.pdf]

TCTTGTGGAAGGACGAAACACCGNNNNNNNNNNNNNNNNNNNTTTTGTAGAGCTAGAAATAGCAAGTTAAAATAAGGCTAGTCCG

PCR

TCTTGTGGAAGGACGAAACACCGNNNNNNNNNNNNNNNNNNNTTTTGTAGAGCTAGAAATAGCAAGTTAAAATAAGGCTAGTCCG  
AGAACACCTTCTGCTTTGTGCGNNNNNNNNNNNNNNNNNNNCAAAATCTCGATCTTTATCGTTCAATTTTATTCCGATCAGG

+

BfuAI Digested Vector

U6 Promoter

ATATATCTTGTGGAAGGACGAAA  
TATATAGAACACCTTCTGCTTTGTGG

sgRNA Scaffold

GTTTTAGAGCTAGAAATAGCAAGTTAAAATAAGGCTAGTCCGTTATCAA  
TCTCGATCTTTATCGTTCAATTTTATTCCGATCAGGCAATAGTT

5' Exonuclease } Gibson Assmby  
DNA Polymerase } Master Mix  
DNA Ligase }

ATATATCTTGTGGAAGGACGAAAACCGNNNNNNNNNNNNNNNNNNNTTTTGTAGAGCTAGAAATAGCAAGTTAAAATAAGGCTAGTCCGTTATCAA  
TATATAGAACACCTTCTGCTTTGTGCGNNNNNNNNNNNNNNNNNNNCAAAATCTCGATCTTTATCGTTCAATTTTATTCCGATCAGGCAATAGTT

**FIGURE S1. Diagram of Gibson assembly.** The plate synthesized sgRNA oligos are PCR amplified using primers which bind to the adaptor sequences. The PCR amplified dsDNA and BfuAI digested pLX-sgRNA-BfuAI-2k vector were combined and the Gibson assembly reaction performed. This inserts the sgRNA targeting sequence between the U6 primer and sgRNA scaffold.
