# Supplementary material for: MicroRNA-focused CRISPR-Cas9 library screen reveals fitness-associated miRNAs
Source: PubMed Central journal article supplement — RNA. 2018 Jul;24(7):966–81. doi: 10.1261/rna.066282.118 (PMC6004052; doi:10.1261/rna.066282.118), 2018-07
Supplement: supp_066282.118_Supplemental_Fig_S2.pdf [file supp_066282.118_Supplemental_Fig_S2.pdf]

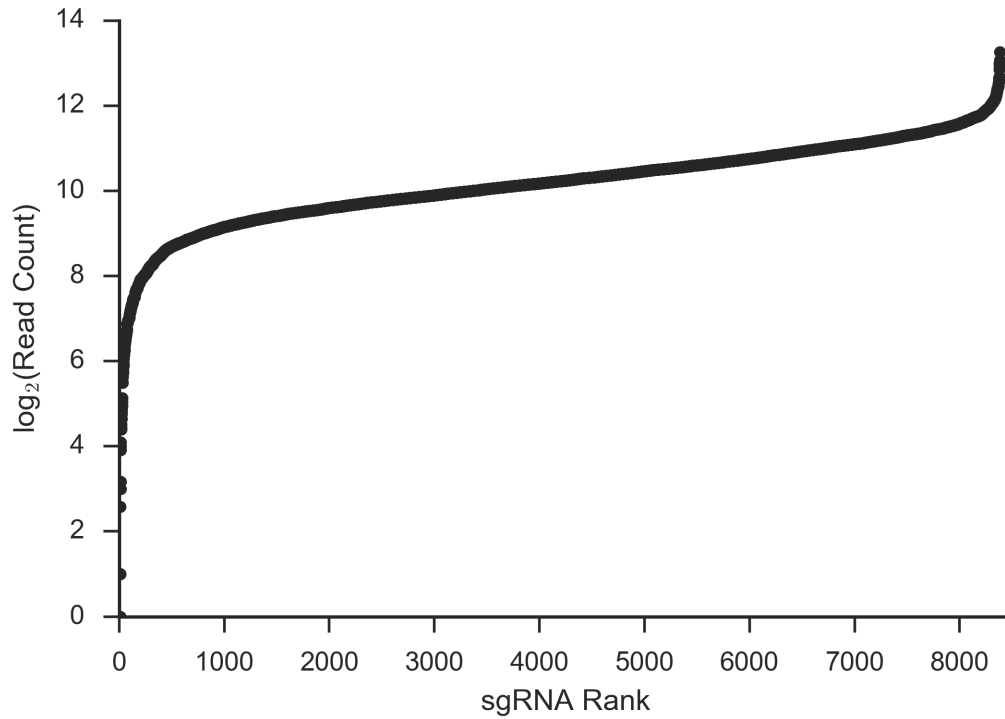

**FIGURE S2. Read counts per sgRNA of the LX-miR plasmid library.** The number of reads per sgRNA were plotted versus the rank of the sgRNA, from lowest to highest read count. Greater than 99% of the sgRNAs in the LX-miR library are represented in the plasmid pool with less than 5 fold difference in read counts between the 10<sup>th</sup> and 90<sup>th</sup> percentiles.
