# Supplementary material for: MicroRNA-focused CRISPR-Cas9 library screen reveals fitness-associated miRNAs
Source: PubMed Central journal article supplement — RNA. 2018 Jul;24(7):966–81. doi: 10.1261/rna.066282.118 (PMC6004052; doi:10.1261/rna.066282.118), 2018-07
Supplement: supp_066282.118_Supplemental_Fig_S3.pdf [file supp_066282.118_Supplemental_Fig_S3.pdf]

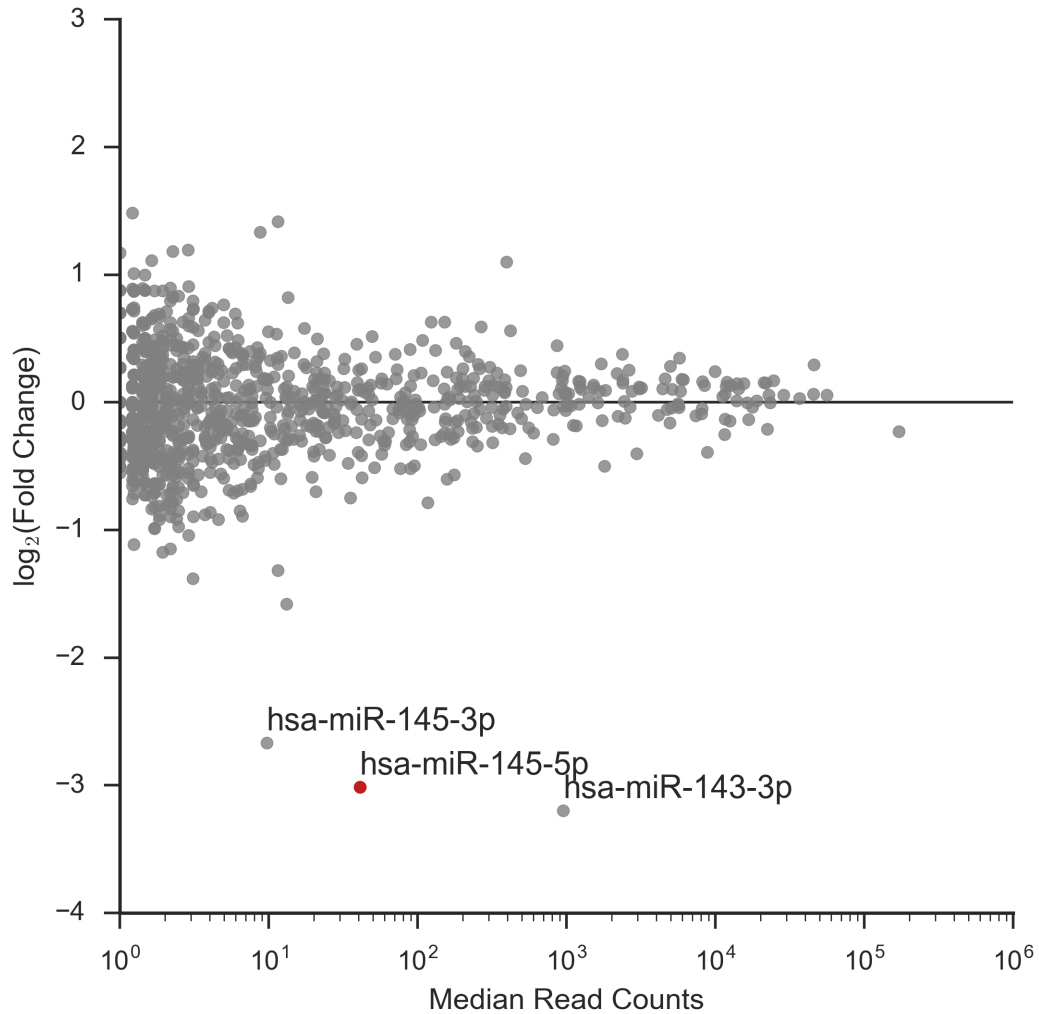

**FIGURE S3. HeLa-Cas9 miRNA expression of initial and uninduced versus induced.** The median read count is plotted versus the log2 fold change between the average of the initial and uninduced HeLa-Cas9 LX-miR pools and the induced HeLa-Cas9 LX-miR pool. The labeled miRNAs have a greater than 4 fold decrease after induction and the red dot indicates miR-145-5p, the only miRNA whose expression changed significantly after induction (DESeq2 adjusted p-value < 0.05).
