# Supplementary material for: MicroRNA-focused CRISPR-Cas9 library screen reveals fitness-associated miRNAs
Source: PubMed Central journal article supplement — RNA. 2018 Jul;24(7):966–81. doi: 10.1261/rna.066282.118 (PMC6004052; doi:10.1261/rna.066282.118), 2018-07
Supplement: supp_066282.118_Supplemental_Fig_S4.pdf [file supp_066282.118_Supplemental_Fig_S4.pdf]

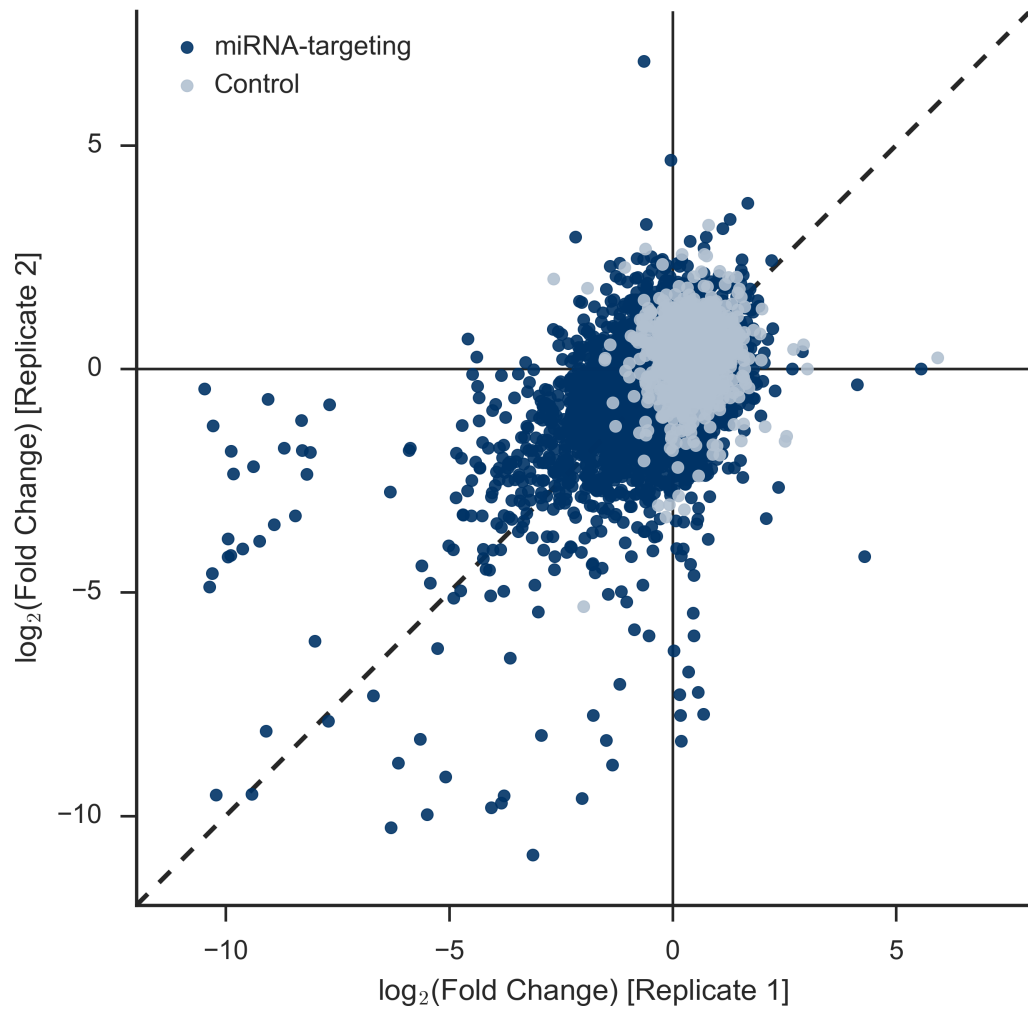

**FIGURE S4. HeLa LX-miR Screen Fold Change Replicate 1 vs Replicate 2.** The fold change for each sgRNA between replicates is significantly correlated (Pearson correlation coefficient: 0.46; p-value: 0.0).
