# Supplementary material for: MicroRNA-focused CRISPR-Cas9 library screen reveals fitness-associated miRNAs
Source: PubMed Central journal article supplement — RNA. 2018 Jul;24(7):966–81. doi: 10.1261/rna.066282.118 (PMC6004052; doi:10.1261/rna.066282.118), 2018-07
Supplement: supp_066282.118_Supplemental_Fig_S5.pdf [file supp_066282.118_Supplemental_Fig_S5.pdf]

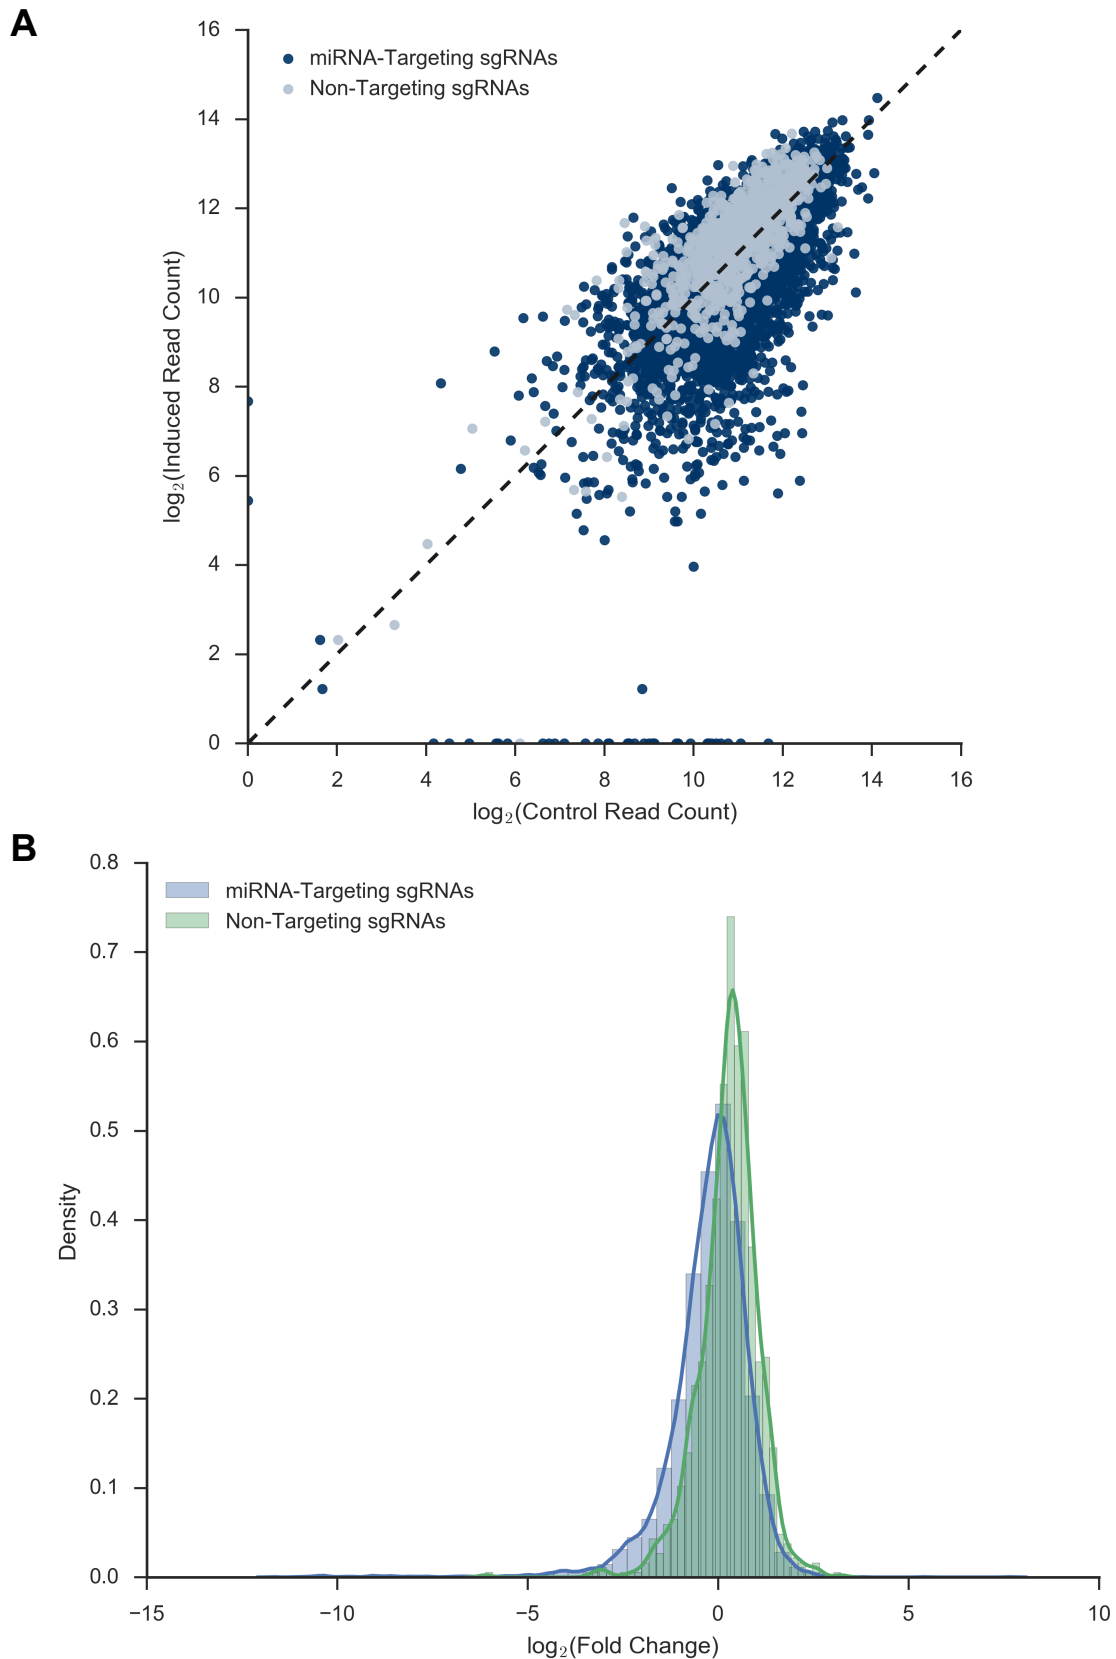

**FIGURE S5. LX-miR HeLa Screen Replicate 2.** (A) Scatter plot of the induced versus control read counts for each sgRNA in replicate 2. The dotted line indicates no change between the populations. (B) The kernel density estimate of the  $\log_2$  fold change between induced and control reads per sgRNA in replicate 2. The green line indicates the distribution of the control non-targeting sgRNAs and the blue line indicates the distribution of the miRNA-targeting sgRNAs.
