# Supplementary material for: MicroRNA-focused CRISPR-Cas9 library screen reveals fitness-associated miRNAs
Source: PubMed Central journal article supplement — RNA. 2018 Jul;24(7):966–81. doi: 10.1261/rna.066282.118 (PMC6004052; doi:10.1261/rna.066282.118), 2018-07
Supplement: supp_066282.118_Supplemental_Fig_S6.pdf [file supp_066282.118_Supplemental_Fig_S6.pdf]

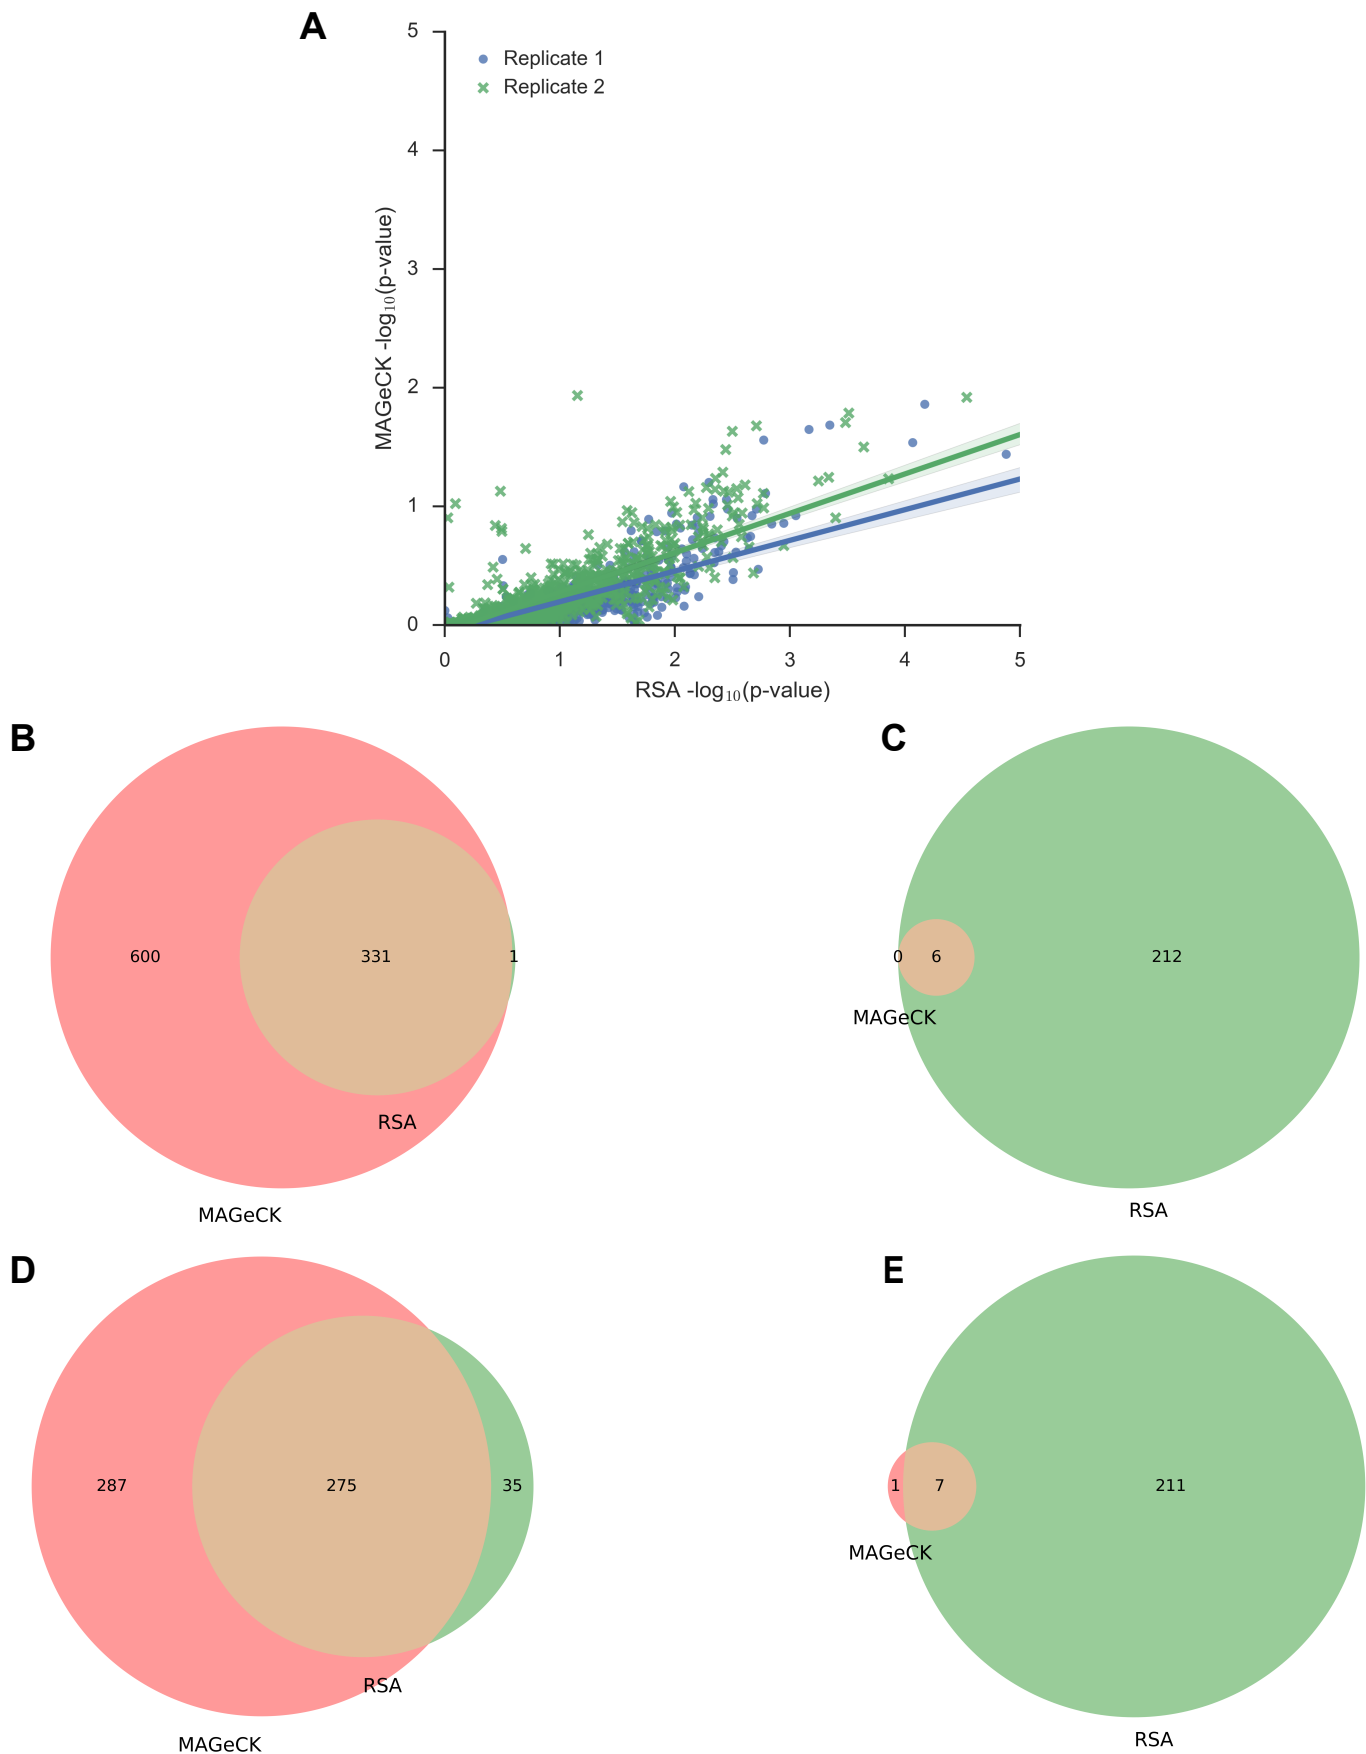

**FIGURE S6. Correlation between MAGeCK and RSA Results.** (A) Scatter plot of MAGeCK and RSA  $-\log_{10}$  p-values for each primary miRNA based on the increase of sgRNAs targeting that primary miRNA. The p-values from both algorithms are highly correlated (Pearson correlation coefficients: 0.81-0.85; p-values: 0.0). (B-E) Venn diagrams of the number of significant MAGeCK and RSA (B,D) pro-fitness or (C,E) anti-fitness primary miRNAs in (B,C) replicate 1 and (D,E) replicate 2.
