# Supplementary material for: MicroRNA-focused CRISPR-Cas9 library screen reveals fitness-associated miRNAs
Source: PubMed Central journal article supplement — RNA. 2018 Jul;24(7):966–81. doi: 10.1261/rna.066282.118 (PMC6004052; doi:10.1261/rna.066282.118), 2018-07
Supplement: supp_066282.118_Supplemental_Fig_S7.pdf [file supp_066282.118_Supplemental_Fig_S7.pdf]

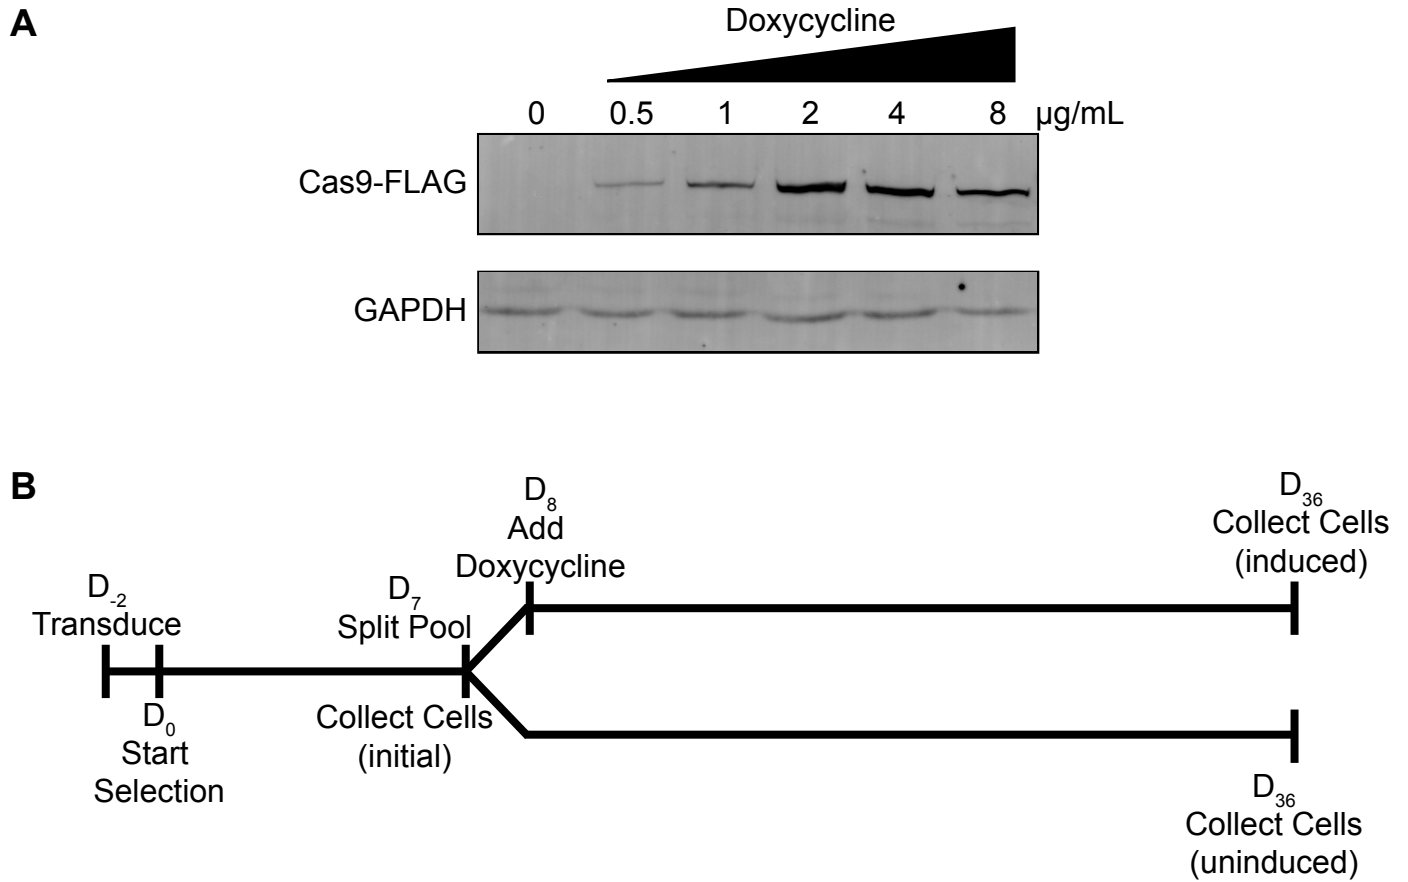

**FIGURE S7. NCI-N87 Screen.** (A) Western blot of FLAG-tagged Cas9 induction after treatment with varying concentrations of doxycycline. (B) Timeline of NCI-N87 screen.
