# Supplementary material for: MicroRNA-focused CRISPR-Cas9 library screen reveals fitness-associated miRNAs
Source: PubMed Central journal article supplement — RNA. 2018 Jul;24(7):966–81. doi: 10.1261/rna.066282.118 (PMC6004052; doi:10.1261/rna.066282.118), 2018-07
Supplement: supp_066282.118_Supplemental_Fig_S8.pdf [file supp_066282.118_Supplemental_Fig_S8.pdf]

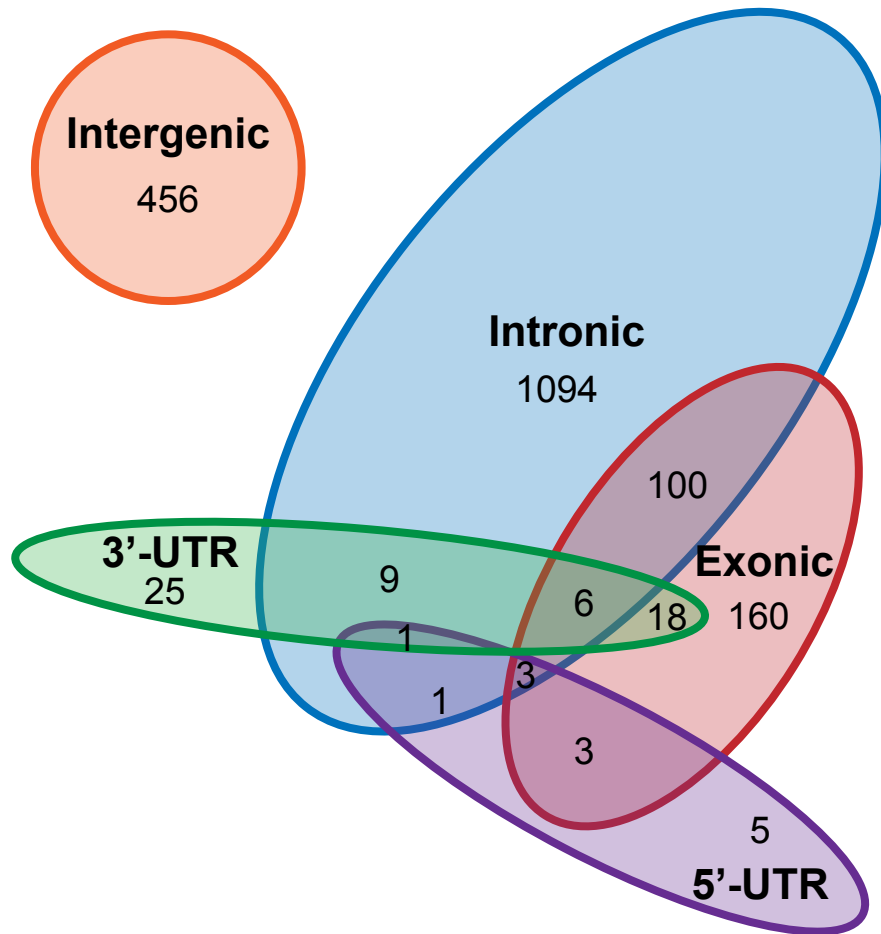

**FIGURE S8. Genomic location of primary miRNAs.** The Venn diagram shows the number of primary miRNAs which overlap with the intronic, exonic, 3'-UTR or 5'-UTR regions of other transcripts or are intergenic. Data from miRBase v21.
